# Supplementary material for: Feasibility of melting fingerprint obtained from ISSR-HRM curves for marine mammal species identification
Source: PeerJ. 2021 Jun 25;9:e11689. doi: 10.7717/peerj.11689 (PMC8237827; doi:10.7717/peerj.11689)
Supplement: Supplemental Information 1 [file peerj-09-11689-s001.xlsx]

## Sheet: Sheet1
Melting temperatures from eight primers of ISSR-HRM analysis of each marine mammalian species
Scientific name	Common name	UBC812	UBC817	UBC818	UBC826	UBC827	UBC847	UBC848	UBC880
Delphinidae
T. aduncus	Indo-Pacific bottlenose dolphin	80.0, 81.9, 86.1, 88.0	77.6, 80.4, 83.9	78.7, 81.8, 83.2, 86.0	78.7, 81.7, 82.9	79.6, 82.2, 83.8, 88.6	77.0, 80.2, 81.8, 90.4	77.7, 81.7, 85.1, 87.3	78.0, 80.3, 82.1, 84.6, 86.9
S. coeruleoalba	Striped dolphin	79.9, 82.1, 86.1, 88.0	77.4, 80.3, 83.9	78.5, 81.8, 83.2, 86.1	79.1, 81.7, 82.8	79.2, 81.7, 83.7	77.6, 80.0, 81.8, 84.3, 90.3	78.6, 81.9, 85.3	78.3, 80.0, 82.1, 84.8
D. capensis	Long-beaked common dolphin	79.3, 81.5	77.3, 79.8,	78.5, 80.0, 81.5, 83.1	78.5, 81.0	79.3, 81.7, 83.9	76.7, 80.6, 82.5	78.4, 81.4	80.0, 82.5, 83.9
S. attenuata	Pantropical spotted dolphin	80.1, 82.0, 86.1, 88.0	77.4, 80.4, 84.2	78.5, 81.6, 83.0, 85.9	79.2, 81.9, 85.2	79.3, 81.7, 83.6, 88.6	77.8, 79.9, 81.6, 90.4	78.8, 81.9, 84.9, 87.0	77.9, 80.8, 82.4, 84.7, 86.8
S. longirostris	Spinner dolphin	79.0, 80.9, 83.7, 86.0, 87.9	77.6, 80.4, 84.0	78.0, 81.6, 83.2, 86.1	79.0, 81.8, 82.7	77.1, 79.0, 81.7, 83.6	77.6, 80.0, 81.8, 84.0, 90.2	78.7, 81.8, 86.8	78.0, 80.1, 82.2, 84.6
S. chinensis	Indo-Pacific humpback dolphin	79.8, 83.8, 86.7	77.8, 80.4	79.5, 81.8, 83.6	78.5, 80.8, 82.7	79.3, 82.0	76.9, 80.8	76.9, 79.1, 81.5	80.4, 83.2, 86.6
L. hosei	Fraser’s dolphin	79.3, 82.0, 85.8, 87.9	77.5, 80.3, 83.8	78.5, 81.7, 83.0, 86.2	79.5, 81.7, 83.0	78.8, 81.7, 83.2	76.7, 80.0, 82.0, 90.5	78.9, 81.9, 90.8	78.1, 80.1, 82.1, 84.7, 87.1
S. bredanensis	Rough-toothed dolphin	76.9, 79.8, 82.4, 84.7	79.9, 83.4	78.2, 81.8, 83.6	78.9, 81.5, 83.8, 85.3	78.6, 81.6, 83.0	77.6, 79.9, 82.5, 85.0, 90.4	78.9, 81.4	78.2, 81.6, 83.7, 85.9
P. crassidens	False killer whale	79.5	78.2, 80.3, 83.3	78.0, 81.5, 87.0	79.0, 81.7, 83.7, 85.8	78.5, 81.9	77.5, 80.4, 83.5, 90.1	78.6, 81.6	78.0, 80.3, 82.1, 84.6, 86.8
G. griseus	Risso’s dolphin	80.0, 82.1, 86.7	78.1, 80.3, 84.1	77.9, 81.7, 83.4	78.3, 81.7, 84.1	78.9, 82.0, 88.2	77.2, 79.9, 81.6, 84.1, 90.4	80.7, 83.0	78.5, 81.5, 84.9, 88.3
G. macrorhynchus	Short-finned pilot whale	79.7, 86.6, 90.1	77.1, 80.3	79.3, 81.8	81.7	79.1, 81.6, 83.8	77.6, 79.9, 81.7, 90.2	81.6, 82.9	78.2, 81.3, 84.5, 86.3, 88.5
Phocoenidae
N. phocaenoides	Finless porpoise	79.4, 85.7, 88.0	77.7, 80.0, 82.7	78.4, 82.5, 90.3	72.3, 78.3, 81.4	79.2, 81.7	75.4, 79.7, 83.3, 87.7	79.7, 83.1	78.2, 80.0, 83.4, 85.9, 89.0
Ziphiidae
Z. cavirostris	Cuvier’s beaked whale	79.5, 81.8, 83.9	74.0, 77.8, 85.2	76.6, 79.4, 83.7	78.3, 80.5, 82.1	77.0, 80.3, 82.0	78.2, 81.5, 85.0	74.2, 78.7, 83.9	79.4, 83.2, 86.2
Kogiidae
K. sima	Dwarf sperm whale	79.4, 81.7, 84.2	77.8, 80.0, 82.0	76.4, 78.3, 81.9, 85.3	78.1, 80.6, 82.6	78.7, 81.2	76.1, 80.7, 82.1	77.3, 79.0, 81.3, 83.9	77.4, 80.0, 82.5, 86.7
K. breviceps	Pygmy sperm whale	79.3, 82.8	77.3, 79.2, 82.2	76.5, 80.0, 81.5	78.1, 80.3, 82.4, 87.2	79.0, 81.4, 83.9	76.5, 80.7, 82.6	71.2, 81.1, 84.0	77.2, 80.3, 82.0, 86.2
Dugongidae
D. dugon	Dugong	77.2, 81.1, 84.7	76.4, 78.4, 82.7	79.1, 81.4, 83.4	78.4, 80.7, 84.1, 87.0	76.9, 81.2, 83.4	76.3, 77.7, 79.6, 81.5, 83.4, 85.8	80.5, 82.5	80.2, 82.5, 84.1, 86.8
