# Supplementary material for: Feasibility of melting fingerprint obtained from ISSR-HRM curves for marine mammal species identification
Source: PeerJ. 2021 Jun 25;9:e11689. doi: 10.7717/peerj.11689 (PMC8237827; doi:10.7717/peerj.11689)
Supplement: Supplemental Information 2 [file peerj-09-11689-s002.xlsx]

## Sheet: Raw
Melting temperatures of eight Inter-simple sequence repeat (ISSR) primers generated by High resolution melting analysis (HRM) of each individual marine mammal
Marine mammal	UBC812	UBC812	UBC812	UBC817	UBC817	UBC817	UBC818	UBC818	UBC818	UBC826	UBC826	UBC826	UBC827	UBC827	UBC827	UBC847	UBC847	UBC847	UBC848	UBC848	UBC848	UBC880	UBC880	UBC880
Spinner dolphin	0	0	0	0	0	0	79.6	83.4	81.8	0	0	0	0	0	0	0	0	0	0	0	0	0	0	0
Spinner dolphin	80.5	85.9	0	80.4	83.9	77.7	0	0	0	0	0	83.3	79.7	81.6	83.9	0	80	83.1	0	81.7	0	80.4	82.7	84.8
Spinner dolphin	0	0	0	80.8	0	0	83.2	80.6	0	76.7	80.7	0	79.7	0	0	0	0	0	0	0	0	80.6	0	0
Spinner dolphin	79.8	0	0	80.2	0	0	78.7	0	0	79	81.9	0	80	0	0	78.3	80	82.1	78.7	81.6	0	80.9	0	84.2
Spinner dolphin	0	0	0	78	80.5	83.4	78.6	0	82.9	81.9	83.4	85.4	79.8	82.6	0	0	81	0	0	0	82.1	0	0	0
Spinner dolphin	0	0	0	80.5	0	77.7	77.1	79.8	0	0	0	83.5	73.5	78.5	0	0	0	0	0	0	0	0	0	0
Spinner dolphin	0	0	0	80.6	0	77.4	77.1	79.7	81.8	79.5	0	83.5	78.6	0	0	0	0	0	0	0	0	80.7	0	0
Spinner dolphin	86.1	79.2	88	80.4	83.9	77.7	83.4	78.2	81.9	0	81.9	0	79	82	0	80.3	81.8	90.2	0	81.6	0	78.1	82.3	84.7
Spinner dolphin	86.1	87.9	79.4	80.4	83.7	77.7	78.1	81.8	83.2	0	81.8	0	77.1	78.8	81.5	80.2	81.7	90.4	78.6	81.9	0	78.1	82.1	84.6
Spinner dolphin	83.8	86.3	0	80.8	84.1	78	79.5	83.4	81.9	0	83.3	85.3	79.9	81.7	83.8	77.9	80.4	82.2	77.9	0	82	61.6	80.7	85.2
Spinner dolphin	79.1	85.9	81.9	80.3	77.7	66.2	78.2	83.1	81.7	0	81.9	0	0	81.8	0	0	81.2	0	0	81.7	89.8	0	82.1	0
Spinner dolphin	86	79.2	87.9	80.3	0	77.4	83.2	78.3	81.7	0	81.9	0	78.7	81.6	83.6	80.3	81.7	90.5	0	81.4	89.9	0	82.2	0
Spinner dolphin	79.2	85.9	87.9	80.4	83.6	0	78	83.1	81.8	79.2	0	82.6	79.7	81.9	0	80.2	81.7	90.2	79.2	81.9	0	78.1	82.3	0
Spinner dolphin	80.9	85.9	87.9	80.3	0	0	78.1	81.7	83.1	78.9	0	82.7	79.2	81.6	83.6	80.3	0	0	78.7	81.7	0	0	82.1	84.6
Spinner dolphin	79.9	85.9	87.9	80.4	0	77.4	81.8	78.4	86.1	79	81.8	0	79.1	81.7	83.5	77.8	80.3	81.8	79.2	81.6	0	70.7	81.9	0
Spinner dolphin	80.4	82.5	77.6	81.3	84.3	77.8	82.2	84	78.5	82.2	83.4	85.6	79.9	0	82.4	78.3	80.6	82.3	80.5	82.3	90.5	78.9	81.5	84.2
Spinner dolphin	86	87.9	80.9	80.4	83.9	77.5	83.2	78.1	81.7	0	81.7	82.5	78.8	81.7	83.4	80.1	81.6	90.1	78.4	81.7	86.6	78.1	82.2	84.5
Spinner dolphin	85.8	80.8	79	80.2	83.6	77.7	78.2	83.1	81.7	79	81.6	0	78.7	81.7	0	80.2	81.7	90.4	78.7	81.5	0	78	82.2	0
Spinner dolphin	79.1	86	80.8	80.4	83.8	77.4	78.2	83.3	81.7	79.1	81.7	86.1	0	81.6	83.6	79.9	81.7	90.2	0	82	0	78	82.2	84.6
Spinner dolphin	79.1	85.8	80.5	80.1	83.7	77.3	79.3	0	81.4	0	81.6	0	79	81.6	0	71	80	81.8	0	81.5	0	78.1	82	84.3
Spinner dolphin	79.2	86	87.9	80.3	83.7	77.7	78	81.7	83.2	0	81.7	0	0	81.6	0	80.1	81.7	90.2	78.6	82	0	78	82.1	0
Spinner dolphin	86	79.3	87.9	80.3	83.8	0	83.1	78	81.6	79.1	81.8	0	78.8	81.7	0	80	81.8	90.1	79.3	81.8	90.1	78.1	82.1	0
Spinner dolphin	86	87.8	78.4	80.3	83.7	77.5	77.9	83.2	81.7	79.3	81.8	82.7	79.2	81.6	83.5	80	81.7	90.1	0	81.3	83	78	82.1	84.4
Spinner dolphin	80	86.2	83.4	80.4	83.9	77.7	0	81.9	86.1	73.1	0	82.7	79.3	81.8	0	77.8	80.2	82.1	79.2	81.9	90.1	78.2	82.1	0
Spinner dolphin	78.7	85.9	87.8	80.3	83.8	77.4	83.2	78	81.6	79.1	81.8	0	78.7	81.7	83.4	79.9	0	90.2	0	81.9	86.7	77.9	82.2	84.6
Spinner dolphin	85.9	80.7	87.9	80.4	83.8	77.7	78.1	83.2	81.7	79.2	0	82.6	78.8	81.5	83.4	80	81.6	90.4	0	81.6	0	78	82.1	84.5
Spinner dolphin	86	87.9	80.5	80.4	83.9	77.7	78.4	81.8	83.2	0	81.8	0	81.7	83.6	85.8	80.2	81.8	90.2	79.2	81.8	89.6	78.1	82.3	84.5
Spinner dolphin	0	0	0	80.3	83.8	0	77.9	83	81.6	79.4	81.6	82.7	0	81.6	0	77.2	80.1	81.7	0	81.9	0	68	82.2	84.5
Spinner dolphin	80.1	86	87.8	80.1	0	0	79.2	0	81.6	79	82.2	86.8	79.5	82	88.3	0	80.5	90.2	78.4	81.7	0	0	81.1	84.7
Spinner dolphin	85.8	79.1	87.7	80.3	83.7	77.3	78	82.8	85.7	79.2	82.3	0	78.8	81.7	0	77.5	80	81.7	78.9	81.9	0	78	82	84.6
Spinner dolphin	81.7	77.4	0	82.4	78.7	76.4	80	83.6	86.9	77.3	79.9	82.3	76.3	81.1	83.8	78.2	80	0	80.6	0	0	0	80.4	0
Cuvier’s beaked whale	79.5	81.8	83.9	77.8	85.2	74	79.4	76.6	83.7	78.3	80.5	82.1	77	80.3	82	78.2	81.5	85	74.2	78.7	83.9	79.4	83.2	86.2
Dwarf sperm whale	79.2	81.5	86.6	77.6	82.2	0	78.1	81.7	0	78	80.6	0	78.6	0	0	76	0	81.8	79.1	81	83.8	80	81.9	86.4
Dwarf sperm whale	79.3	81.8	76.2	77.8	0	0	78.1	81.7	89.7	0	80.5	82.7	78.9	81.1	91.6	76.2	80.8	0	77.3	79.1	81.3	79.9	82.6	86.9
Dwarf sperm whale	79.7	0	0	78.1	79.9	0	0	81.9	0	78.9	80.6	82.2	79.7	0	0	0	79.1	0	0	80.1	0	79.8	82.1	0
Dwarf sperm whale	79.6	81.8	0	78	81.7	0	0	81.8	0	78.1	82.7	84.9	79	81.2	84.7	76.3	78.7	81.4	79.2	81.2	0	79.7	0	84.8
Dwarf sperm whale	82.2	85.2	79.7	78.5	76.3	0	76.8	80.4	83.7	75.8	78.4	82.6	78.9	82.8	88.5	0	80.3	82.7	79.1	81.2	0	77.7	79.9	83.7
Dwarf sperm whale	79.8	76.9	0	77.7	0	0	76.6	78.9	0	78	80.3	0	79.1	84.7	88.8	77.4	0	0	79.1	0	0	77.7	80.2	0
False killer whale	77.3	80.3	85.5	77.8	80.4		79	0	0	79.8	81.7	0	75.4	76.4	81.5	0	81.2	0	0	0	0	76.9	80.7	0
False killer whale	78.1	82.5	80.4	76.4	84.9	78.4	79.3	0	0	76.4	79.1	80.5	73.1	79.1	81.4	0	0	0	78	0	0	0	0	83.8
False killer whale	79.7	0	0	0	80.1	0	78	81.2	0	79.1	81.5	0	0	0	0	77.6	80.1	0	78.6	81.5	0	76.5	80.5	84.4
False killer whale	79.5	0	0	0	79.9	78.3	77.9	81.4	0	78.8	81.6	0	0	79	81	77.6	79.9	0	78.6	81.7	0	76.5	80.5	84.3
False killer whale	79.6	86.3	84.3	77.8	80.2	0	78	81.6	0	79	81.7	83.6	0	78.6	82.1	81	83.6	90.2	0	81.5	0	78	82	84.5
False killer whale	79.8	84.8	0	77.9	80.3	0	78	81.7	87.1	0	81.7	83.6	78.7	82.8	85.5	77.5	80.5	90	0	81.7	0	78.1	82	84.6
False killer whale	81.1	78.5	89.7	78.3	0	0	80.1	81.9	62.1	78.3	80.5	82.7	74.7	80.2	81.1	77.1	79.1	82.6	0	80.1	0	0	0	0
Striped dolphin	0	0	0	0	0	0	0	0	0	0	0	0	0	0	0	0	0	0	0	0	0	0	0	0
Striped dolphin	0	0	0	78.4	80.6	0	0	0	0	77.9	79.8	86.1	61.4	75.4	82.2	0	0	0	0	0	0	78.8	0	83
Striped dolphin	0	0	0	78	80	82.5	79.2	77.1	82.2	79.1	83.6	87.2	78.7	82.3	85.9	78.1	81.7	0	77.7	0	0	77.7	80.7	83.4
Striped dolphin	0	0	0	0	0	0	79.8	0	0	0	0	0	0	0	0	0	0	0	0	0	0	0	0	0
Striped dolphin	80.8	83.5	0	78.3	80.9	0	79.8	0	83.8	79.6	82.2	0	80.3	82.1	84.4	0	80.5	0	79.9	82.5	0	78.4	81.7	83.9
Striped dolphin	84	82	86.3	79.4	0	83.8	0	0	0	73.4	79.4	83.3	78	80.5	85.5	79.5	0	85.7	0	0	86.4	0	80.5	88.9
Striped dolphin	77.8	80.2	0	77.2	0	0	79.4	83.8	86.4	77.5	79.2	83.9	80.3	82.9	86.3	0	0	0	0	0	0	76.9	0	87
Striped dolphin	79.9	86	82.2	77.7	80.3	0	79	0	0	0	82.7	0	79.7	0	0	0	80.1	82.8	78.9	82.2	0	65.8	81.2	0
Striped dolphin	0	0	0	79.6	0	0	0	0	0	0	82.8	85.3	78.1	81.4	0	0	0	0	0	0	0	77.1	0	83.8
Striped dolphin	0	0	0	0	0	0	0	0	0	0	0	0	0	0	0	0	0	0	0	0	0	0	0	0
Striped dolphin	80.2	86.2	0	77.5	80.4	83.8	79.2	81.5	0	78.8	82.7	0	79.6	0	0	0	80.7	0	0	81.8	0	0	81.7	84.6
Striped dolphin	79.8	86	88.4	77.4	80.4	83.9	78.4	81.9	0	0	81.9	0	78.8	81.5	0	80.1	82	90.5	78.9	81.9	90	78.1	82.1	84.7
Striped dolphin	0	0	0	0	0	0	0	0	0	0	0	0	0	0	0	0	0	0	0	0	0	0	0	0
Striped dolphin	80.4	78.9	0	0	80.5	0	77	79	83.4	79.2	82.2	0	0	80.1	0	78	80.1	82.9	79	82.1	0	0	81.1	85
Striped dolphin	0	0	0	0	0	0	0	80	0	0	0	85.5	0	0	84.2	0	0	0	0	0	0	0	0	0
Striped dolphin	80.3	86.3	90.2	0	80	83.8	79	81.6	83.2	78.7	0	83	79.1	81.9	0	0	80.2	82	71	81.8	0	0	82.4	0
Striped dolphin	0	0	0	78.3	80.8	84.1	77.5	79.8	81.8	79.4	82	83.5	79	82	0	0	80.1	0	0	0	0	0	81.4	0
Striped dolphin	80.6	86.4	90.6	77.9	80.8	84.1	0	80.3	83.7	83.4	85.6	88	0	82.1	84	78	80.6	82.4	80.1	82.3	90.5	78.8	82.5	85.1
Striped dolphin	80.2	0	0	78	80.8	83.8	79.8	82.1	83.6	79.4	82.2	0	79.5	82.2	0	78.2	80.6	85.9	79.3	0	0	78.9	80.9	85
Striped dolphin	80	86.1	90.1	77.5	80.4	84	78.6	81.7	83.2	0	81.9	0	79.7	81.6	0	0	82	90.7	67.3	79	82	0	81.9	0
Striped dolphin	86.2	80.1	82.3	77.3	80.5	83.8	0	80.5	0	0	82.8	0	79.1	81.9	0	80.1	81.9	0	79.9	81.8	90.4	0	82.3	0
Striped dolphin	79.9	82	85.1	77.3	80.4	83.8	79.4	81.9	0	0	81.8	0	0	81.7	0	0	81.9	90.2	78.7	81.7	0	78.1	82.2	84.7
Striped dolphin	79.9	0	0	77.4	80.4	83.6	78.2	79.9	81.9	0	81.9	0	78.9	81.7	0	79.9	81.9	90.2	79.4	82	90.4	74.4	78.3	82.1
Striped dolphin	79.8	86.1	87.9	77.2	80.4	83.7	81.9	83	90.2	0	81.9	0	0	81.6	88.6	80.3	82	90.6	71.1	78.5	81.7	80.2	82.2	0
Striped dolphin	79.8	86	81.9	77.3	80.2	83.8	79.4	81.8	70.3	72.3	81.7	0	0	81.6	0	79.9	81.7	90.3	78.6	81.8	0	78.2	83.4	85.9
Striped dolphin	79.8	86.2	82	77.5	80.3	83.7	78.2	81.6	83.5	0	82.4	0	0	81.4	83.4	80.1	81.9	90.6	0	81.7	0	78.1	82	0
Striped dolphin	80	85.8	82	77.7	80.2	83.8	78.6	81.6	83.1	0	81.7	0	0	81.7	0	0	80	81.7	78.6	82	87.3	0	82	0
Striped dolphin	0	0	0	0	80.1	0	0	80.9	0	0	0	0	0	0	0	0	0	0	0	0	0	0	0	0
Striped dolphin	79.7	81.9	85.7	77.5	80.4	84	78.7	81.7	0	0	81.5	0	78.9	81.4	0	80.4	82.4	90.4	77.8	82	90.1	78.2	80.9	0
Striped dolphin	78.9	85.7	87.6	0	80.1	83.6	77.9	81.5	83	0	81.5	0	78.6	81.6	0	80	81.6	90.2	81.1	78.3	81.8	78.2	82	0
Pygmy sperm whale	79.3	82.8	0	77.3	79.2	82.1	81.5	0	0	80.3	82.4	87.2	79	81.4	83.9	76.5	80.7	82.6	71.2	81.1	84	77.2	80.3	82
Finless porpoise	78.7	82.2	0	73.5	77.9	80.6	79.1	81.8	0	80.1	82.5	84.5	69.2	78.6	80.8	0	0	0	77.8	0	0	79.9	0	84.2
Finless porpoise	79.4	85.7	88	77.7	80	82.7	78.4	82.5	90.3	72.3	78.3	81.4	0	79.2	81.6	75.4	79.7	83.3	79.7	0	83.1	77.8	80.1	82
Fraser’s dolphin	0	0	0	77.7	80.6	0	0	81.2	0	0	0	0	0	0	81.6	0	0	0	0	0	0	0	0	0
Fraser’s dolphin	79.5	85.8	87.7	77.5	80.3	83.7	78.6	82.9	0	0	81.6	0	0	78.6	81.5	80.1	82	90.2	78.7	82	89	78	80.3	82.2
Fraser’s dolphin	79.8	85.8	82	77.3	80.2	83.7	78.6	81.5	0	0	0	82.5	0	79.8	81.8	79.9	82.7	90.4	78.3	81.7	0	0	0	82
Fraser’s dolphin	79.5	85.7	87.8	77.2	80.2	83.6	78.4	81.8	83	0	81.7	0	0	0	81.6	80.3	81.8	90.7	0	81.6	0	78.2	0	82.2
Fraser’s dolphin	79.1	85.9	87.8	77.2	80.3	83.6	78.4	81.7	0	79.3	81.7	0	0	78.5	81.6	80.1	81.8	90.6	78.8	81.9	86.3	78.1	80.2	82.2
Fraser’s dolphin	79.5	85.6	87.9	77.3	80.3	83.8	78.3	81.9	90.8	0	81.8	82.7	57.9	78.9	81.9	80.1	82.1	90.7	78.8	82	90.9	78.2	0	82.3
Fraser’s dolphin	0	0	0	0	0	81.5	76.2	78.5	80.8	79.4	81.3	84	75.9	79.7	0	0	0	0	75.9	0	0	0	0	0
Rough-toothed dolphin	79.6	0	0	79.7	0	0	77.4	0	81.6	78.9	81.4	0	58.3	79.4	0	77.8	79.8	82.8	79.1	81.8	84	69.9	76.6	81
Rough-toothed dolphin	79.7	84.7	0	79.8	0	0	78.2	81.7	83.6	0	81.5	0	78.7	81.5	88.3	79.8	82.3	90.5	79.6	0	90.8	0	76.8	81.5
Rough-toothed dolphin	78	80	0	0	0	0	78.7	80.9	0	74.5	76.8	82.2	0	80.4	85	0	0	0	0	0	0	0	81.3	83.3
Rough-toothed dolphin	80.1	84.6	89.6	80.1	0	0	77.9	81.7	83.6	0	81.7	0	78.5	81.6	0	77	79.8	90.4	79	0	91	0	78.3	81.6
Rough-toothed dolphin	79.8	0	0	79.9	0	0	77.9	81.7	83.6	0	81.5	0	78.7	81.8	0	77.5	79.7	82.7	78.8	81.4	0	0	76.7	81.6
Rough-toothed dolphin	79.4	84.6	82.3	80.3	0	0	78	81.6	83.5	79.8	81.7	0	78.6	81.7	82.8	80	82.4	90.4	79.8	0	0	0	78.2	81.6
Rough-toothed dolphin	79.5	84.6	89.4	80.3	0	0	78.1	81.7	83.6	0	81.7	0	78.6	81.7	82.8	80	82.3	90.2	79.8	0	0	0	78.2	81.7
Dugong	81.2	77.4	84.6	82.9	79.1	76.6	79.4	0	83.5	80.7	84.3	87.1	76.8	81.2	83.4	76.7	0	82.4	80.8	82.7	0	80.5	82.6	86.8
Dugong	81.2	77.8	84.8	80.1	83.3	77.7	80.1	0	82.9	77	82.5	84.7	76.9	81.4	83.5	0	0	0	79.4	0	0	80.7	83.8	0
Dugong	77	81.1	83.2	0	82.8	78.4	79.3	0	83.4	80.3	84	86.8	76.6	81.2	83.4	0	81.5	0	0	80.3	82.4	80.2	84.1	86.7
Dugong	83.4	77.7	81	82.2	78.5	80.4	79.1	0	81.5	80.1	81.8	83.5	72.3	81.3	84	0	81.4	0	0	0	0	80.4	84.4	86.6
Dugong	81.3	77.5	0	82.9	76.6	79.2	79.6	0	83.6	80.9	0	84.5	77.1	81.5	83.5	0	82.6	85.8	80.8	82.9	0	80.5	82.5	86.9
Dugong	77.2	81.2	87	82.9	0	78.5	79.4	0	83.6	80.6	84.2	87.1	72.1	76.9	81.3	0	0	83.4	80.5	82.5	0	82.5	84.2	86.8
Dugong	81.2	77.4	84.6	76.5	79	83.1	76.7	81	83.3	80.8	84.4	0	77.5	82.7	86.8	78.3	81.4	0	80.7	82.8	0	80.4	0	86.9
Dugong	77.7	81.6	79.3	79.2	81.9	0	77.9	81.5	85.2	78	81.3	84.8	77	81.5	83.4	0	0	0	0	0	85.4	82.8	0	87.2
Dugong	77	81.1	86.9	82.9	78.4	0	79.2	0	83.5	80.4	84	87	76.6	81.4	83.1	81.5	83.3	85.6	80.2	82.4	87.4	80.1	84.2	86.7
Dugong	81.2	77.1	84.4	82.7	78.6	0	79.3	0	83.5	80.5	84.1	86.9	79.3	81.5	84.1	76.2	81.7	83.4	80.4	82.5	0	82.6	84.3	86.7
Dugong	81.1	77	84.4	82.9	78.6	0	79.4	0	83.5	80.4	84.1	86.9	72.1	76.7	81.2	0	81.5	83.3	80.1	82.5	0	82.3	84.2	86.8
Dugong	81.4	77.5	0	77.3	80.8	82.6	79.3	81.2	84.2	75.1	81.3	83	76.5	81.4	0	79.5	81.5	0	80.6	0	0	61.3	78.4	82.2
Dugong	77.3	81.2	83.4	82.9	78.7	76.8	79.4	0	83.6	80.7	84.2	87	76.6	81.2	0	76.5	81.5	85.8	80.7	82.7	0	82.6	84.3	86.8
Dugong	77.1	81.1	86.9	82.9	78.5	0	79.3	0	83.5	80.5	84	87	77.1	81.3	83.4	0	81.5	83.7	80.3	82.5	0	80.1	82.6	86.7
Dugong	81.3	77.4	84.6	82.8	0	77.7	76.7	80.2	83.7	78.8	80.5	82.1	72.1	81.5	83.4	0	83.1	85.5	0	81	83.8	81.4	0	0
Dugong	81	77	84.3	82.8	78.4	76.4	79.7	81.1	83.6	78.4	80.8	84.2	76.7	81.2	83.3	76.1	0	83.4	71.5	80.5	0	82.5	84.2	86.8
Dugong	81	77	84.3	82.7	78.4	0	79.5	0	83.5	0	84.2	86.6	0	81.3	83.5	0	83.5	92	80.4	0	0	82.2	84	86.7
Dugong	81.4	78.6	84.5	83	79.7	77		80	82	78.7	81.9	83.9	79.6	81.7	83.7	0	0	85.1	0	0	84.1	82.4	86.6	88.6
Dugong	81	77	84.2	82.7	78.4	76.2	79.3	0	83.4	80.5	84.2	86.8	76.6	81	83.4	76.1	0	83.3	80.3	0	0	80.1	82.6	86.6
Dugong	81.1	77.2	83.3	82.8	76.3	0	79.3	0	83.5	80.8	84.2	87	74.4	80.3	84	0	81.6	0	76.6	80.5	82.6	80.4	82.4	86.6
Dugong	77	81	83.2	82.8	78.7	0	79.3	0	83.3	78.2	80.2	83.8	77.1	81.4	83.5	0	0	83.4	80.3	82.4	87.5	80.1	84.3	86.7
Dugong	77.1	81.1	83.2	82.7	76.3	0	79.3	0	83.4	80.4	84	86.9	76.8	81.2	83.5	0	82.4	85.6	80.4	82.5	0	80.2	82.6	86.5
Dugong	77	81	84.3	82.8	78.4	0	79.3	0	83.4	68.5	80.7	84.3	76.8	81.4	83.4	70.2	76.5	81.6	76.5	80.6	82.7	80.4	82.3	84.3
Dugong	77	81.1	84.6	82.9	78.4	0	79.8	0	83.4	80.4	84	86.9	76.1	78.3	82.6	0	81.5	85.5	80.3	82.3	0	80.1	82.5	86.6
Long-beaked common dolphin	80.7	83.8	0	77.2	79.8	0	78.7	0	85.8	78.4	80.9	0	79.5	0	0	77.8	79	81.8	78.4	81	0	80	0	84
Long-beaked common dolphin	79.3	81.5	0	77.4	79.6	0	79.9	0	0	0	80.4	0	79.1	81.6	83.7	76.7	0	80.6	78.3	81.6	0	80.2	82.4	0
Risso’s dolphin	83.4	76.2	79.6	78.7	76	84.5	78.2	80.8	0	67.6	80.8	84	79.1	81.2	83.7	76.7	79.4	0	78.4	0	0	0	80.7	83.3
Risso’s dolphin	79.8	84.5	90.1	79.9	0	0	77.9	81.7	83.1	78.9	81.7	0	79	81.9	88.1	77.5	80.2	81.6	71.9	81.9	0	76.6	0	0
Risso’s dolphin	80.2	0	0	80.1	0	83.9	78	81.5	83.3	0	81.7	84	79	82	88.2	77.2	81.4	90.7	0	82.2	0	80.6	82.5	84.3
Risso’s dolphin	79.7	76.3	82.8	0	77.6	82.1	76.9	80.6	83.7	78.2	81.4	87.1	70	74	80.7	76.7	0	0	0	0	0	80.2	82.5	0
Risso’s dolphin	79.9	89.8	0	80.2	78.3	0	77.9	81.7	0	0	81.7	0	73.4	78.9	82.2	77.4	81.4	90	0	81.7	0	76.5	81.6	0
Risso’s dolphin	80.1	86.7	90.4	80.4	0	0	78.1	80.1	81.7	0	81.8	0	78.9	81.6	88.2	79.7	81.7	90.5	0	80.6	0	78.5	81.6	88.3
Short-finned pilot whale	79.7	86.6	90.1	80.3	77.1	0	0	79.3	81.8	81.7	0	0	79.1	81.6	0	79.9	81.7	90.2	0	81.6	82.9	78.2	81.3	88.5
Pantropical spotted dolphin	79	85.8	87.8	80.3	77.8	83.7	77.7	81.6	0	78.8	81.7	0	78.8	81.7	83.6	0	81.5	0	0	81.5	0	0	80.6	82.5
Pantropical spotted dolphin	80.1	85.7	0	77.6	80.5	84.2	78.7	81.7	85.7	0	81.9	0	78.6	82	83.5	80	82.2	0	78.8	82	84.8	78.1	81.1	0
Pantropical spotted dolphin	78.8	80.7	0	80.7	78.6	76.8	79.5	82.1	86.6	79.4	82.8	85.9	61	82	88.4	0	0	0	0	82.2	0	78.2	80.8	82.8
Pantropical spotted dolphin	79.6	85.9	87.9	80.3	77.5	0	78.7	81.4	0	78.9	81.8	0	0	81.8	0	79.9	81.8	0	78.5	81.4	0	0	80.7	84.5
Pantropical spotted dolphin	79.9	85.8	81.9	80.3	77.3	84	0	81.6	82.9	79	81.9	85.1	70	76.2	79.6	80	81.7	90.5	78.7	81.8	84.7	77.9	81.2	0
Pantropical spotted dolphin	79.8	85.8	81.5	80.4	77.3	84.1	79.6	81.7	90	79.9	81.8	0	79.5	81.5	88.7	80.2	82	90.6	79.2	81.8	0	78	82.2	0
Pantropical spotted dolphin	78.3	85.9	87.8	80.3	77.4	83.8	77.8	81.5	82.9	79.5	82.4	0	79.3	82	83.7	79.8	81.4	90	77.3	81.7	0	0	82.2	0
Pantropical spotted dolphin	0	0	0	78.4	75.4	80.6	0	81.7	0	79.2	81	0	79.7	0	0	0	0	0	79.4	81	0	0	81.1	84.7
Pantropical spotted dolphin	80.2	86	87.8	80.5	77.4	84	78.9	81.7	0	78.7	82.5	85	79.1	81.7	88.5	77.7	80	81.9	78.6	81.9	84.6	80.1	82.2	0
Pantropical spotted dolphin	0	0	0	80.5	77.4	0	77.2	79.7	0	79.3	81.7	0	79.4	0	0	0	0	0	0	0	0	0	0	0
Pantropical spotted dolphin	77.2	0	0	80.1	77.1	0	0	80.2	0	75.4	77.4	79.8	77.5	82.2	85	0	0	0	76.5	80	83.9	0	81.8	0
Pantropical spotted dolphin	78.5	86.1	75.4	80.5	78.7	84.4	78.7	81	86	73.3	78.9	83	69.9	79.8	82.1	0	80.3	0	0	80.2	0	0	82.2	85
Pantropical spotted dolphin	0	80.4	0	80.4	77.5	82.5	76.4	79	83.1	78.6	0	0	77	79.6	82.1	0	0	0	79.8	0	0	0	0	0
Pantropical spotted dolphin	0	80.6	0	80.6	78.1	0	79.4	81.3	0	79.1	82	0	79.4	0	82.2	78.1	80.4	0	76.6	79	81.9	78.7	81.2	0
Pantropical spotted dolphin	0	80.2	0	80.3	77.9	0	76.8	79	0	79.1	81.1	0	0	79.8	0	78.2	80	82.4	78.9	82	0	75.4	80.9	83
Pantropical spotted dolphin	0	80.1	0	80.3	77.6	83.8	78.5	81.3	0	78.7	82.5	85	0	79.8	0	79.8	0	82.3	78.6	81.8	0	77.4	80.5	82.8
Pantropical spotted dolphin	0	0	0	0	79.2	0	0	0	0	76.7	79.5	0	76.6	79.9	82.3	77.9	80.4	0	74.7	76.4	80.8	0	0	0
Pantropical spotted dolphin	79.3	85.4	77.1	80.9	78.2	0	77	79.5	81	0	82.4	0	72.9	74.5	79.5	0	0	0	75.9	79.3	83.7	77.4	81.2	83.2
Pantropical spotted dolphin	0	80.5	0	80.4	0	0	77	79.4	81.5	0	81.8	0	0	79.5	85.7	0	0	0	76.4	79.7	83.5	80	0	0
Pantropical spotted dolphin	81.2	83	0	0	0	0	75.7	79	80.7	80.3	82.4	0	0	0	81.3	77	0	82	0	80	0	0	80.9	83.6
Pantropical spotted dolphin	79.6	86	87.9	80.3	77.8	0	78.4	81.6	0	78.9	82.8	0	0	79.7	81.8	79.8	0	82	79	81.6	0	0	80.6	0
Pantropical spotted dolphin	0	80.1	86	80	77.4	0	78.8	81.6	0	0	81.7	0	0	79.1	81.7	79.7	81.7	90.1	78.4	81.5	0	0	81.7	0
Pantropical spotted dolphin	85.8	78.9	87.7	80.1	0	83.6	78.1	81.5	82.8	78.7	81.7	0	78.8	81.7	83.4	79.9	81.6	0	78.3	81.5	0	0	0	84.4
Pantropical spotted dolphin	80.2	0	0	80.6	0	83.3	77.4	79.9	0	79.4	82.1	85.5	0	79.6	81.2	77.5	80.6	0	79.1	81.8	0	80.7	82.9	84.9
Pantropical spotted dolphin	0	0	0	0	77.3	0	0	0	0	0	0	0	0	0	0	0	0	0	0	0	0	0	0	0
Pantropical spotted dolphin	79.9	86	87.8	80.3	77.4	84.2	78.7	81.8	0	0	82	0	78.9	81.7	88.5	80.1	81.9	90.4	0	81.8	0	78.1	80.8	84.7
Pantropical spotted dolphin	81.6	0	0	80.4	78.1	84.2	0	0	0	79.5	0	89.8	77.6	79.8	81.7	0	0	0	77.2	79.9	0	0	80.9	83.7
Indo-Pacific bottlenose dolphin	79.9	86.2	90.2	80.2	77.5	83.5	79.3	81.9	90.3	79	82.5	86.5	79.7	82.3	88.7	80.7	0	90.4	77.5	81.6	0	0	82.3	84.8
Indo-Pacific bottlenose dolphin	84.9	80.8	78.8	80.3	77.5	81.6	77.2	79.3	82	78.8	80.4	82.1	80.6	82.5	85.9	80.7	83	0	0	81.8	0	78.6	80.8	83.1
Indo-Pacific bottlenose dolphin	83.4	0	0	0	78.7	75.3	0	0	0	0	0	0	0	0	0	0	0	0	0	80.3	0	0	0	0
Indo-Pacific bottlenose dolphin	80.3	82.3	71.7	80.4	77.8	0	79.3	83.5	85.5	79.3	0	82.2	74.5	79.8	82.4	80.1	0	0	78.7	0	0	78.6	81	83.4
Indo-Pacific bottlenose dolphin	77.5	80.9	86.2	79.9	78	86.4	65	79.6	0	0	0	0	70.4	80.5	88.8	77.6	0	82.9	79.9	0	0	75.8	78.5	80.6
Indo-Pacific bottlenose dolphin	80.5	84.7	77.1	80	0	75.8	79	81.8	0	77.8	79.7	82.8	0	0	0	0	0	0	0	0	0	80.1	82.6	85.2
Indo-Pacific bottlenose dolphin	0	0	0	0	0	0	0	0	0	0	0	0	0	0	0	0	0	0	0	0	0	0	0	0
Indo-Pacific bottlenose dolphin	80.2	0	86	80	77.5	0	78.7	81.7	0	79	82.7	86.5	79.7	0	82.1	80.7	83	85.1	0	81.8	0	77.4	80.6	84.8
Indo-Pacific bottlenose dolphin	80	86.2	90.1	80.3	77.4	0	78.2	81.7	90.2	0	81.7	0	79.7	82.1	88.6	80.6	82.9	85	77.9	81.8	84.7	0	80.4	84.6
Indo-Pacific bottlenose dolphin	80	86.3	90.3	80.2	77.5	0	78.5	81.7	83.5	0	82.6	0	79.4	81.7	83.6	0	81.8	0	0	81.6	0	0	82.1	0
Indo-Pacific bottlenose dolphin	80.2	82	85.6	80.2	77.4	83.8	78	81.3	83.2	0	82.6	0	0	80.9	83.3	79.5	81.2	0	77.6	81.5	0	78.1	81.5	84.5
Indo-Pacific bottlenose dolphin	76.3	82.2	0	80.8	0	75.8	76.5	81.4	83.8	0	0	0	78.5	81.7	85.1	0	0	0	0	81	0	0	80.9	0
Indo-Pacific bottlenose dolphin	80.8	83	0	80.6	78.1	0	79.1	82.7	86.3	79.5	82.4	83.6	62.4	75.9	82.1	0	0	0	77.2	79.1	0	0	0	0
Indo-Pacific bottlenose dolphin	80.3	86.2	88	80.3	77.7	83.8	79.2	82	0	78.8	82.8	86.9	79.9	0	82.3	0	80.9	0	0	81.8	90.3	0	81.9	84.8
Indo-Pacific bottlenose dolphin	80	86.3	90.3	80.2	77.4	83.5	79.5	81.8	83.5	0	82.8	0	80.1	82.5	88.4	77.1	81.9	90.3	78	81.7	0	0	82.1	84.7
Indo-Pacific bottlenose dolphin	80.1	86.2	82	80.2	77.4	83.7	79.1	82	0	0	81.7	86.8	79.8	82.2	88.7	77.1	81.9	90.3	0	81.7	0	0	82.1	84.8
Indo-Pacific bottlenose dolphin	80.5	0	0	80.5	78.4	76.2	80	81.8	83.6	75.3	79.2	0	77.6	79.6	81.8	77.6	80.2	0	78.3	80.2	0	78.5	81.2	83.5
Indo-Pacific bottlenose dolphin	72.2	0	0	80.4	78	84.4	77.6	86.3	90.5	78.9	81.5	0	79.8	0	82.7	0	0	83.1	0	0	0	78.5	81.1	84.3
Indo-Pacific bottlenose dolphin	79.7	86.2	82.1	80.3	78.2	0	78.9	82	0	78.7	81.8	0	78.5	81.4	0	77	81.3	90.3	78.8	81.9	0	80.3	82.4	0
Indo-Pacific bottlenose dolphin	79.6	85.9	87.9	80.4	0	83.8	78	81.8	83.3	79.2	81.9	0	78.8	81.9	83.5	80.2	81.6	90.5	79.3	81.7	0	78	82.1	84.5
Indo-Pacific bottlenose dolphin	79.7	86.1	87.9	80.3	77.5	83.8	0	81.8	83.2	0	81.7	0	79.3	82.2	88.4	0	81.6	0	0	81.5	0	0	82.2	84.5
Indo-Pacific bottlenose dolphin	80.1	86.2	87.8	80.4	77.1	83.9	78.2	81.7	0	0	81.8	82.7	79.2	81.8	88.7	80.2	81.8	90.1	78.4	81.7	86.9	78.1	82.1	84.6
Indo-Pacific bottlenose dolphin	80.3	86.1	87.9	80.2	77.6	88.7	78.9	81.8	0	78.7	0	82	79.8	0	82.3	64.4	80.5	90.1	78.6	81.8	0	80.5	82.3	84.8
Indo-Pacific bottlenose dolphin	80	86.5	88.1	80.6	77.7	84.2	78.5	82.1	86.2	0	0	83	79.4	82.5	88.9	80.5	82.1	90.3	77.6	81.8	87.2	80.5	82.4	84.9
Indo-Pacific bottlenose dolphin	77.3	79.3	81.1	81	79	86	78	79.9	0	0	0	82.1	76	79.5	81.8	0	82.9	0	0	0	86.1	0	82.5	0
Indo-Pacific bottlenose dolphin	80.8	78.5	86.1	80.3	0	75.9	76.7	79.2	81.8	79.4	81.8	0	78.2	80.3	83.8	0	0	0	78.8	0	0	80.8	0	85
Indo-Pacific bottlenose dolphin	79.7	86	87.7	80.2	77.1	83.4	77.8	81.7	85.8	0	81.5	0	79.1	82	88.4	76.9	81.6	89.8	77.2	81.4	0	0	82	84.5
